# Supplementary material
Source: HighWire-hosted journal article supplement (https://www.cmajopen.ca/highwire/filestream/80878/field_highwire_adjunct_files/0/open-2015-0092-1-at.pdf)
Supplement: open-2015-0092-1-at.pdf [file open-2015-0092-1-at.pdf]

Appendix 1 (as supplied by the authors): Extant and reduced tray composition

Extant tray composition — tonsillectomy

| DESCRIPTION                                                 | CATALOG                 | QTY      |
|-------------------------------------------------------------|-------------------------|----------|
| DAVIS MOUTH GAG RIGHT DBL ( <b>Boyle Davis</b> )            | <b>Storz N7450</b>      | <b>1</b> |
| BLADE TONGUE LARGE 4                                        |                         | <b>1</b> |
| BLADE TONGUE MED 3 1/2                                      |                         | <b>1</b> |
| BLADE TONGUE SMALL 3                                        |                         | <b>1</b> |
| FCP ROCH-PEAN HEMOSTAT CVD 6 1/4 ( <b>Curved Kelly</b> )    | <b>Pilling 182445</b>   | <b>3</b> |
| WHITE TONSIL FCP.MED.CVD. ( <b>Tenaculum</b> )              | <b>Storz N7032</b>      | <b>1</b> |
| DISSECTOR HURD/RETR PILLAR D/E ( <b>Pillar Retractor</b> )  | <b>Storz N6750</b>      | <b>1</b> |
| BASIN EMESIS EX SMALL ( <b>Kidney</b> )                     |                         | <b>1</b> |
| CUP IODINE 6 OZ ( <b>Large, circular</b> )                  | <b>Pilling 471120</b>   | <b>1</b> |
| PEERS NON-PEF TOWEL CLAMP                                   | <b>Pilling 12-1650</b>  | <b>1</b> |
| CUP MEDICINE 2 OZ                                           | <b>Pilling 471115</b>   | <b>3</b> |
| SCALPEL HANDLE 7                                            | <b>K-Medic KM29-062</b> | <b>1</b> |
| MIRROR DENTAL                                               |                         | <b>1</b> |
| CURETTE SMALL ( <b>Adenoid Curette</b> )                    |                         | <b>1</b> |
| CURETTE LARGE ( <b>Adenoid Curette</b> )                    |                         | <b>1</b> |
| KNIFE FISHER ( <b>Fisher Blade</b> )                        |                         | <b>1</b> |
| TISSUE TONSIL ( <b>Pickups</b> )                            |                         | <b>1</b> |
| WIEDER TONGUE DEPRESSOR L ( <b>Sweetheart</b> )             | <b>Storz N7332</b>      | <b>1</b> |
| WIRE SNARE # 8 ( <b>Snare</b> )                             | <b>Pilling 461264</b>   | <b>2</b> |
| RETR LOVE UVULA 18MM                                        | <b>Storz N6200</b>      | <b>1</b> |
| TENACULA SHORT ( <b>Smaller Tenaculum</b> )                 |                         | <b>1</b> |
| SCHNIDT FCP 7 1/4 OPEN ( <b>Snaps</b> )                     | <b>Storz N7122</b>      | <b>2</b> |
| HOOK NEGRAS                                                 |                         | <b>1</b> |
| FCP ALLIS TISSUE 5 X 6 TEETH 6" REG WEIGHT ( <b>Allis</b> ) | <b>Pilling 182860</b>   | <b>3</b> |
| SCISS METZ CVD 7 ( <b>Metz</b> )                            | <b>Pilling 141462</b>   | <b>1</b> |
| RONIS ADENOID PUNCH                                         | <b>Storz N6178</b>      | <b>1</b> |

Total

34

Reduced tray composition — tonsillectomy

| DESCRIPTION                                                | CATALOG                     | QTY      |
|------------------------------------------------------------|-----------------------------|----------|
| DAVIS MOUTH GAG RIGHT DBL ( <b>Boyle Davis</b> )           | <b>Storz N7450</b>          | <b>1</b> |
| BLADE TONGUE LARGE 4                                       |                             | <b>1</b> |
| BLADE TONGUE MED 3 1/2                                     |                             | <b>1</b> |
| BLADE TONGUE SMALL 3                                       |                             | <b>1</b> |
| FCP ROCH-PEAN HEMOSTAT CVD 6 1/4 ( <b>Curved Kelly</b> )   | <b>Pilling<br/>182445</b>   | <b>3</b> |
| WHITE TONSIL FCP.MED.CVD. ( <b>Tenaculum</b> )             | <b>Storz N7032</b>          | <b>1</b> |
| DISSECTOR HURD/RETR PILLAR D/E ( <b>Pillar Retractor</b> ) | <b>Storz N6750</b>          | <b>1</b> |
| BASIN EMESIS EX SMALL ( <b>Kidney</b> )                    |                             | <b>1</b> |
| CUP IODINE 6 OZ ( <b>Large, circular</b> )                 | <b>Pilling<br/>471120</b>   | <b>1</b> |
| PEERS NON-PEF TOWEL CLAMP                                  | <b>Pilling 12-<br/>1650</b> | <b>1</b> |
| TISSUE TONSIL ( <b>Pickups</b> )                           |                             | <b>1</b> |

Total

13

Extant tray composition — skin

| DESCRIPTION                                                    | CATALOG         | QTY |
|----------------------------------------------------------------|-----------------|-----|
| FCP ADSON 15CM 1 x 2 TOOTHED (Toothed Adsons)                  | Pilling 181223  | 2   |
| FCP ADSON SERRATED 4-3/4" (Non toothed Adsons)                 | Pilling 181220  | 1   |
| FCP ADSON TISSUE 5" 1.7MM TIP BROWN-TYPE TEETH (Adson Browns)  | Codman 30-1189  | 1   |
| CASTRO FCP STR JAW .5MM (Castros)                              | Storz E1798     | 1   |
| FCP CASTROVIEJO SUTURING (Castros w/ holes in handles)         | Katena K5-2510  | 1   |
| HOOK SKIN 2 PIECE (Short skin hook)                            |                 | 2   |
| HOOK GILLES SKIN LG 4MM (Longer skin hook)                     | Pilling 054130  | 2   |
| RETR SENN PRONG FINE SHARP (Senns)                             | Pilling 164750  | 2   |
| HOOK JOSEPH SKIN DBL 10MM (Wide double skin hook)              | Pilling 442108  | 2   |
| RETR RAGNELL D/E 5.75 (Ragnell)                                | Pilling 054600  | 2   |
| CUP IODINE 6 OZ (Big cup)                                      | Pilling 471120  | 1   |
| CUP MEDICINE 2 OZ (Small cup)                                  | Pilling 471115  | 2   |
| TUBE SUCTION FERG FRAZ 6FR SZ 0                                | Pilling 162410  | 1   |
| STYLETTE                                                       |                 | 1   |
| RETR BECKMAN-WEITLANER SHARP 5 1/2 (Self-retracting retractor) | Pilling 165370  | 1   |
| SCALPEL HANDLE BARRON # 3 (Cylindrical scalpel handle)         | Aesculap BB068R | 1   |
| HANDLE KNIFE STANDARD #3 (Normal scalpel handle)               | Pilling 352950  | 2   |
| FCP SPONGE STR SERR 9 1/2 (Sponge stick)                       | Pilling 121417  | 1   |
| SCISS MAYO STR BEV 6 3/4 (Mayos)                               | Pilling 141312  | 1   |
| SCISS METZ CVD 7 (Metz)                                        | Pilling 141462  | 1   |
| SCISS JAMISON METZ CVD 6 (TENOTOMY)                            | Pilling 342220  | 1   |
| NH CRILE WOOD FINE TC 6 (Small fine needle driver)             | Pilling 152780  | 1   |
| NH HALSEY 5 TC (Mini toothed driver)                           | Pilling 152800  | 1   |
| FCP ALLIS TISSUE 5 X 6 TEETH 6" REG WEIGHT (Allis)             | Pilling 182860  | 1   |
| FCP HALSTEAD MOSQ CVD 5 (Mosquito)                             | Pilling 182310  | 6   |
| SCISS STEVENS TENOTOMY CVD 4.4 (Curved Stevens)                | Pilling 144352  | 1   |
| SCISS STEVEN TENOTOMY STR 4.4 (Straight Stevens)               | Pilling 144350  | 1   |
| SCISS IRIS STR SS 4 1/2 (Sharpies)                             | Pilling 144300  | 1   |
| FCP BACKHAUS TOWEL 3 1/2 (Piercing towel clip)                 | Pilling 121605  | 2   |

Total

43

Reduced tray composition — skin

| DESCRIPTION                                            | CATALOG         | QTY |
|--------------------------------------------------------|-----------------|-----|
| FCP ADSON 15CM 1 x 2 TOOTHED (Toothed Adsons)          | Pilling 181223  | 2   |
| CASTRO FCP STR JAW .5MM (Castros)                      | Storz E1798     | 1   |
| FCP CASTROVIEJO SUTURING (Castros w/ holes in handles) | Katena K5-2510  | 1   |
| HOOK GILLES SKIN LG 4MM (Longer skin hook)             | Pilling 054130  | 2   |
| HOOK JOSEPH SKIN DBL 10MM (Wide double skin hook)      | Pilling 442108  | 2   |
| CUP MEDICINE 2 OZ (Small cup)                          | Pilling 471115  | 2   |
| TUBE SUCTION FERG FRAZ 6FR SZ 0                        | Pilling 162410  | 1   |
| SCALPEL HANDLE BARRON # 3 (Cylindrical scalpel handle) | Aesculap BB068R | 1   |
| HANDLE KNIFE STANDARD #3 (Normal scalpel handle)       | Pilling 352950  | 2   |
| FCP SPONGE STR SERR 9 1/2 (Sponge stick)               | Pilling 121417  | 1   |
| SCISS MAYO STR BEV 6 3/4 (Mayos)                       | Pilling 141312  | 1   |
| NH CRILE WOOD FINE TC 6 (Small fine needle driver)     | Pilling 152780  | 1   |
| NH HALSEY 5 TC (Mini toothed driver)                   | Pilling 152800  | 1   |
| FCP ALLIS TISSUE 5 X 6 TEETH 6" REG WEIGHT (Allis)     | Pilling 182860  | 1   |
| SCISS STEVENS TENOTOMY CVD 4.4 (Curved Stevens)        | Pilling 144352  | 1   |
| SCISS STEVEN TENOTOMY STR 4.4 (Straight Stevens)       | Pilling 144350  | 1   |
| SCISS IRIS STR SS 4 1/2 (Sharpies)                     | Pilling 144300  | 1   |
| FCP BACKHAUS TOWEL 3 1/2 (Piercing towel clip)         | Pilling 121605  | 2   |
| FCP HALSTEAD MOSQ CVD 5 (Mosquito)                     | Pilling 182310  | 2   |
| FCP ADSON SERRATED 4-3/4" (Non toothed Adsons)         | Pilling 181220  | 1   |

Total

27

Extant tray composition — sinus

| DESCRIPTION                            | CATALOG        | QTY |
|----------------------------------------|----------------|-----|
| COTTLE SEPTUM SPECULUM                 | Storz N2200    | 1   |
| CUP MEDICINE 2 OZ                      | Pilling 471115 | 1   |
| FCP LUCAE EAR DEL 5 1/2" (Bayonets)    | Storz N0900    | 1   |
| WIEDER TONGUE DEPRESSOR L (Sweetheart) | Storz N7332    | 1   |
| SCISS OPER STR S/S 5.5                 | Pilling 460140 | 1   |
| VIENNA NASAL SPEC. #1 (short)          | Storz N2121    | 1   |
| VIENNA NASAL SPEC. #3 (long)           | Storz N2123    | 1   |
| SUCTION CURVED # 10                    | Pilling 29304  | 1   |
| STYLETTE                               |                | 1   |
| SUCTION ANGLED # 8                     | Pilling 29302  | 1   |
| STYLETTE                               |                | 1   |
| SUCTION MALLEABLE # 1 (Curved Suction) | Storz N2486    | 1   |
| STYLETTE                               |                | 1   |
| FCP PEERS TOWEL 5 3/4 (Piercing clips) | Pilling 121650 | 1   |

| DESCRIPTION                                       | CATALOG           | QTY |
|---------------------------------------------------|-------------------|-----|
| PUNCH, BLUNTNOSE, 1.0 MM, STR                     | Acufex 012035     | 1   |
| FCP RHINO 451001-B (Straight Thru-cut)            |                   | 1   |
| FCP RHINO 451500-B (Upgoing thru-cut)             |                   | 1   |
| FCP RP5801 (Straight, small biopsies)             |                   | 1   |
| FCP RP5802 (Upgoing, small biopsies)              |                   | 1   |
| FCP BLAKESLEY STR #1 (Blakesley)                  | Karl Storz 456001 | 1   |
| ELEV GORNEY SEPTUM SUCTION (Suction elevator)     | Karl Storz 474001 | 1   |
| STYLETTE                                          |                   | 1   |
| SUCTION TUBE 4MM LONG CV (Big curved sucker)      | Karl Storz 586040 | 1   |
| SUCTION TUBE 2.5MM LONG C (Medium, curved sucker) | Karl Storz 586031 | 1   |
| SUCTION ANTRUM SMALL (Small, curved sucker)       |                   | 1   |
| PROBE D/E S.50.714 (Frontal probe)                |                   | 1   |
| OSTIUM SEEKER,MAX,BALLTIP (Ball probe)            | Karl Storz 629820 | 1   |
| ANTRUM CURETTE 1.5X6MM (Straight curette)         | Karl Storz 628702 | 1   |
| CURETTE,SM,OBLONG,45 DEG (J curette)              | Karl Storz 628714 | 1   |
| CURETTE,SM,OBLONG,90 DEG (90 degree J)            | Karl Storz 628712 | 1   |

| DESCRIPTION                           | CATALOG     | QTY |
|---------------------------------------|-------------|-----|
| ELEV NASAL FRACTURE BOIES (Persuader) | Storz N4655 | 1   |
| ENT MALLET (Hammer)                   |             | 1   |

| DESCRIPTION                                            | CATALOG                   | QTY |
|--------------------------------------------------------|---------------------------|-----|
| COTTLE SEPTUM SPECULUM                                 | Storz N2200               | 1   |
| VIENNA NASAL SPEC. #4                                  | Storz N2106               | 1   |
| WIEDER TONGUE DEPRESSOR S (Sweetheart)                 | Storz N7330               | 1   |
| FCP ADSON SERRATED 4-3/4" (Adsons)                     | Pilling 181220            | 1   |
| FCP BROWN TISSUE 9 X 9 4-3/4 (Adson Browns)            | Pilling 181235            | 1   |
| FCP ADSON 15CM 1 x 2 TOOTHED (Toothed Adsons)          | Pilling 181223            | 1   |
| FCP LUCAE EAR DEL 5 1/2" (Bayonetts)                   | Storz N0900               | 2   |
| BUCK EAR CUR,DULL,#0 (Wax curette)                     | Storz N0400-0             | 1   |
| CUP MEDICINE 2 OZ (Cup)                                | Pilling 471115            | 3   |
| FCP SUCTION UP (suction forceps, upgoing)              |                           | 1   |
| FCP SUCTION STRAIGHT (suction forceps, straight)       |                           | 1   |
| BACK BITER PEADIATRIC                                  |                           | 1   |
| EAR SUCTION TUBING                                     |                           | 1   |
| JANSEN-MIDDLETON FCP.4X11 (Jansen-Middleton)           | Storz N3070               | 1   |
| Chuck Handle #3K, 10cm long (Beaver blade handle)      | Katena K20-1910           | 1   |
| SCALPEL HANDLE # 7 (Long, skinny scalpel handle)       | Pilling M36-16            | 1   |
| FREER ELEVATOR 7" D/E (Freer)                          | Storz N2348               | 1   |
| OSTEOTOME COTTLE 9MM                                   | Storz N4339               | 1   |
| OSTEOTOME COTTLE 6MM                                   | Storz N4337               | 1   |
| OSTEOTOME COTTLE 4MM                                   | Storz N4334               | 1   |
| ELEV HOWARTH (Howarth)                                 |                           | 1   |
| ELEV COTTLE STORZ (Cottle)                             | Storz N4660               | 1   |
| KNIFE COTTLE NASAL (Cottle knife)                      | Storz N4240               | 1   |
| RETR NEIVERT BALL TIP (2-ball retractor)               | Storz N4285               | 1   |
| HOOK GILLES SKIN LG 4MM (Skin hooks)                   | Pilling 054130            | 2   |
| SICKLE KNIFE 10MM CVD SNG                              | Storz N2909               | 1   |
| ballenger swivel knife                                 | Instrumentarium<br>477703 | 1   |
| suction freer                                          |                           | 1   |
| SUCTION ANGLED # 8                                     | Pilling 29302             | 1   |
| STYLETTE                                               |                           | 1   |
| SUCTION CURVED # 10                                    | Pilling 29304             | 1   |
| STYLETTE                                               |                           | 1   |
| SUCTION TUBE 4MM SHORT CV (shortest, 45 degree sucker) | Karl Storz 586240         | 1   |
| SUCTION TUBE 3MM LONG CV (medium, 90 degree sucker)    | Karl Storz 586030         | 1   |
| SUCTION TUBE 3MM SHORT CV (medium, gentler curve)      | Karl Storz 586230         | 1   |
| NH CRILE WOOD TC 7 (Needle driver)                     | Pilling 152782            | 1   |
| NH HALSEY 5 TC (short driver)                          | Pilling 152800            | 1   |
| FCP HALSTEAD MOSQ CVD 5 (Curved mosequito)             | Pilling 182310            | 2   |
| FCP BACKHAUS TOWEL 5 1/2 (piercing towel clip)         | Pilling 121600            | 2   |

| DESCRIPTION                                             | CATALOG           | QTY |
|---------------------------------------------------------|-------------------|-----|
| FCP PEERS TOWEL 5 3/4 (Non piercing clip)               | Pilling 121650    | 5   |
| SCISS MAYO STR BEV 6 3/4 (Mayos)                        | Pilling 141312    | 1   |
| SCISS METZ CVD 5 3/4" REG (Metz)                        | Pilling 142200    | 1   |
| SCISS STEVENS TENOTOMY CVD 4.4 (Curved short stevens)   | Pilling 144352    | 1   |
| SCISS FOMON LOWER LAT CVD 5.0 (medium, curved scissors) | Pilling 056360    | 1   |
| SCISS EYE CVD 4 (sharpies)                              | Pilling 423434    | 1   |
| SCISS KNIGHT NASAL MED WT (Septal scissors)             | Storz N2886       | 1   |
| SCISS NASAL RT 11MM BLADES (Endoscopic scissors, Right) | Karl Storz 449202 | 1   |
| SCISS NASAL LFT 11MM BLADES (Endoscopic scissors, Left) | Karl Storz 449203 | 1   |
| SCISS NASAL STR 11MM BLADES (Endoscopic Scissors)       | Karl Storz 449201 | 1   |
| FCP BLAKESLEY UP #0 (Upgoing Blakesley)                 | Karl Storz 457000 | 1   |
| BLAKESLEY FCP 90' UP 4X10 (90 degree Blakesley)         | Karl Storz 456801 | 1   |
| OST ANT PNCH LF SIDE CUT (Left punch)                   | Karl Storz 459012 | 1   |
| OST ANT PNCH RT SIDE CUT (Right punch)                  | Karl Storz 459011 | 1   |
| OST ANT PNCH BCK 3MMX7MM (Straight punch)               | Karl Storz 459010 | 1   |
| FCP WILDE NASAL STR (Wildes)                            | Storz N2980       | 1   |
| FCP WEIL NASAL.STR.ROUND (Weil)                         | Storz N2974       | 1   |
| FCP BIOPSY STR DOUBLE SPOON 9" (Spoon nasal biopsy)     | Karl Storz 723030 | 1   |
| FCP GRASPING HEUWIESER ANTRUM 5.1" (Heuwieser)          | Xomed 3711071     | 1   |

Total

100

Reduced tray composition — sinus

| DESCRIPTION                                       | CATALOG              | QTY |
|---------------------------------------------------|----------------------|-----|
| COTTLE SEPTUM SPECULUM                            | Storz N2200          | 1   |
| CUP MEDICINE 2 OZ                                 | Pilling 471115       | 1   |
| FCP LUCAE EAR DEL 5 1/2" (Bayonets)               | Storz N0900          | 1   |
| VIENNA NASAL SPEC. #1 (short)                     | Storz N2121          | 1   |
| VIENNA NASAL SPEC. #3 (long)                      | Storz N2123          | 1   |
| FCP RHINO 451001-B (Straight Thru-cut)            |                      | 1   |
| FCP RHINO 451500-B (Upgoing thru-cut)             |                      | 1   |
| FCP BLAKESLEY STR #1 (Blakesley)                  | Karl Storz<br>456001 | 1   |
| SUCTION TUBE 4MM LONG CV (Big curved sucker)      | Karl Storz<br>586040 | 1   |
| SUCTION TUBE 2.5MM LONG C (Medium, curved sucker) | Karl Storz<br>586031 | 1   |
| SUCTION ANTRUM SMALL (Small, curved sucker)       |                      | 1   |
| PROBE D/E S.50.714 (Frontal probe)                |                      | 1   |
| OSTIUM SEEKER,MAX,BALLTIP (Ball probe)            | Karl Storz<br>629820 | 1   |
| ANTRUM CURETTE 1.5X6MM (Straight curette)         | Karl Storz<br>628702 | 1   |
| CURETTE,SM,OBLONG,45 DEG (J curette)              | Karl Storz<br>628714 | 1   |
| CURETTE,SM,OBLONG,90 DEG (90 degree J)            | Karl Storz<br>628712 | 1   |
| ELEV NASAL FRACTURE BOIES (Persuader)             | Storz N4655          | 1   |
| FCP LUCAE EAR DEL 5 1/2" (Bayonetts)              | Storz N0900          | 2   |
| CUP MEDICINE 2 OZ (Cup)                           | Pilling 471115       | 3   |
| BACK BITER PEADIATRIC                             |                      | 1   |
| ELEV COTTLE STORZ (Cottle)                        | Storz N4660          | 1   |
| SUCTION ANGLED # 8                                | Pilling 29302        | 1   |
| SUCTION CURVED # 10                               | Pilling 29304        | 1   |
| FCP BACKHAUS TOWEL 5 1/2 (piercing towel clip)    | Pilling 121600       | 2   |
| FCP PEERS TOWEL 5 3/4 (Non piercing clip)         | Pilling 121650       | 5   |
| SCISS MAYO STR BEV 6 3/4 (Mayos)                  | Pilling 141312       | 1   |
| FCP BLAKESLEY UP #0 (Upgoing Blakesley)           | Karl Storz<br>457000 | 1   |
| BLAKESLEY FCP 90' UP 4X10 (90 degree Blakesley)   | Karl Storz<br>456801 | 1   |

Total

36



Extant tray composition — septoplasty

| DESCRIPTION                            | CATALOG        | QTY |
|----------------------------------------|----------------|-----|
| COTTLE SEPTUM SPECULUM                 | Storz N2200    | 1   |
| CUP MEDICINE 2 OZ                      | Pilling 471115 | 1   |
| FCP LUCAE EAR DEL 5 1/2" (Bayonets)    | Storz N0900    | 1   |
| WIEDER TONGUE DEPRESSOR L (Sweetheart) | Storz N7332    | 1   |
| SCISS OPER STR S/S 5.5                 | Pilling 460140 | 1   |
| VIENNA NASAL SPEC. #1 (short)          | Storz N2121    | 1   |
| VIENNA NASAL SPEC. #3 (long)           | Storz N2123    | 1   |
| SUCTION CURVED # 10                    | Pilling 29304  | 1   |
| STYLETTE                               |                | 1   |
| SUCTION ANGLED # 8                     | Pilling 29302  | 1   |
| STYLETTE                               |                | 1   |
| SUCTION MALLEABLE # 1 (Curved Suction) | Storz N2486    | 1   |
| STYLETTE                               |                | 1   |
| FCP PEERS TOWEL 5 3/4 (Piercing clips) | Pilling 121650 | 1   |

| DESCRIPTION                                       | CATALOG         | QTY |
|---------------------------------------------------|-----------------|-----|
| ELEV NASAL FRACTURE BOIES (Persuader)             | Storz N4655     | 1   |
| ENT Mallet (Hammer)                               |                 | 1   |
| COTTLE SEPTUM SPECULUM                            | Storz N2200     | 1   |
| VIENNA NASAL SPEC. #4                             | Storz N2106     | 1   |
| WIEDER TONGUE DEPRESSOR S (Sweetheart)            | Storz N7330     | 1   |
| FCP ADSON SERRATED 4-3/4" (Adsons)                | Pilling 181220  | 1   |
| FCP BROWN TISSUE 9 X 9 4-3/4 (Adson Browns)       | Pilling 181235  | 1   |
| FCP ADSON 15CM 1 x 2 TOOTHED (Toothed Adsons)     | Pilling 181223  | 1   |
| FCP LUCAE EAR DEL 5 1/2" (Bayonets)               | Storz N0900     | 2   |
| BUCK EAR CUR,DULL,#0 (Wax curette)                | Storz N0400-0   | 1   |
| CUP MEDICINE 2 OZ (Cup)                           | Pilling 471115  | 3   |
| FCP SUCTION UP (suction forceps, upgoing)         |                 | 1   |
| FCP SUCTION STRAIGHT (suction forceps, straight)  |                 | 1   |
| BACK BITER PEADIATRIC                             |                 | 1   |
| EAR SUCTION TUBING                                |                 | 1   |
| JANSEN-MIDDLETON FCP.4X11 (Jansen-Middleton)      | Storz N3070     | 1   |
| Chuck Handle #3K, 10cm long (Beaver blade handle) | Katena K20-1910 | 1   |
| SCALPEL HANDLE # 7 (Long, skinny scalpel handle)  | Pilling M36-16  | 1   |
| FREER ELEVATOR 7" D/E (Freer)                     | Storz N2348     | 1   |
| OSTEOTOME COTTLE 9MM                              | Storz N4339     | 1   |
| OSTEOTOME COTTLE 6MM                              | Storz N4337     | 1   |

| DESCRIPTION                                             | CATALOG                   | QTY |
|---------------------------------------------------------|---------------------------|-----|
| OSTEOTOME COTTLE 4MM                                    | Storz N4334               | 1   |
| ELEV HOWARTH (Howarth)                                  |                           | 1   |
| ELEV COTTLE STORZ (Cottle)                              | Storz N4660               | 1   |
| KNIFE COTTLE NASAL (Cottle knife)                       | Storz N4240               | 1   |
| RETR NEIVERT BALL TIP (2-ball retractor)                | Storz N4285               | 1   |
| HOOK GILLES SKIN LG 4MM (Skin hooks)                    | Pilling 054130            | 2   |
| SICKLE KNIFE 10MM CVD SNG                               | Storz N2909               | 1   |
| ballenger swivel knife                                  | Instrumentarium<br>477703 | 1   |
| suction freer                                           |                           | 1   |
| SUCTION ANGLED # 8                                      | Pilling 29302             | 1   |
| STYLETTE                                                |                           | 1   |
| SUCTION CURVED # 10                                     | Pilling 29304             | 1   |
| STYLETTE                                                |                           | 1   |
| SUCTION TUBE 4MM SHORT CV (shortest, 45 degree sucker)  | Karl Storz 586240         | 1   |
| SUCTION TUBE 3MM LONG CV (medium, 90 degree sucker)     | Karl Storz 586030         | 1   |
| SUCTION TUBE 3MM SHORT CV (medium, gentler curve)       | Karl Storz 586230         | 1   |
| NH CRILE WOOD TC 7 (Needle driver)                      | Pilling 152782            | 1   |
| NH HALSEY 5 TC (short driver)                           | Pilling 152800            | 1   |
| FCP HALSTEAD MOSQ CVD 5 (Curved mosequito)              | Pilling 182310            | 2   |
| FCP BACKHAUS TOWEL 5 1/2 (piercing towel clip)          | Pilling 121600            | 2   |
| FCP PEERS TOWEL 5 3/4 (Non piercing clip)               | Pilling 121650            | 5   |
| SCISS MAYO STR BEV 6 3/4 (Mayos)                        | Pilling 141312            | 1   |
| SCISS METZ CVD 5 3/4" REG (Metz)                        | Pilling 142200            | 1   |
| SCISS STEVENS TENOTOMY CVD 4.4 (Curved short stevens)   | Pilling 144352            | 1   |
| SCISS FOMON LOWER LAT CVD 5.0 (medium, curved scissors) | Pilling 056360            | 1   |
| SCISS EYE CVD 4 (sharpies)                              | Pilling 423434            | 1   |
| SCISS KNIGHT NASAL MED WT (Septal scissors)             | Storz N2886               | 1   |
| SCISS NASAL RT 11MM BLADES (Endoscopic scissors, Right) | Karl Storz 449202         | 1   |
| SCISS NASAL LFT 11MM BLADES (Endoscopic scissors, Left) | Karl Storz 449203         | 1   |
| SCISS NASAL STR 11MM BLADES (Endoscopic Scissors)       | Karl Storz 449201         | 1   |
| FCP BLAKESLEY UP #0 (Upgoing Blakesley)                 | Karl Storz 457000         | 1   |
| BLAKESLEY FCP 90' UP 4X10 (90 degree Blakesley)         | Karl Storz 456801         | 1   |
| OST ANT PNCH LF SIDE CUT (Left punch)                   | Karl Storz 459012         | 1   |
| OST ANT PNCH RT SIDE CUT (Right punch)                  | Karl Storz 459011         | 1   |
| OST ANT PNCH BCK 3MMX7MM (Straight punch)               | Karl Storz 459010         | 1   |
| FCP WILDE NASAL STR (Wildes)                            | Storz N2980               | 1   |
| FCP WEIL NASAL.STR.ROUND (Weil)                         | Storz N2974               | 1   |
| FCP BIOPSY STR DOUBLE SPOON 9" (Spoon nasal biopsy)     | Karl Storz 723030         | 1   |
| FCP GRASPING HEUWIESER ANTRUM 5.1" (Heuwieser)          | Xomed 3711071             | 1   |

| DESCRIPTION | CATALOG | QTY |
|-------------|---------|-----|
|-------------|---------|-----|

Total

84

Reduced tray composition — septoplasty

| DESCRIPTION                                             | CATALOG         | QTY |
|---------------------------------------------------------|-----------------|-----|
| COTTLE SEPTUM SPECULUM                                  | Storz N2200     | 1   |
| CUP MEDICINE 2 OZ                                       | Pilling 471115  | 1   |
| FCP LUCAE EAR DEL 5 1/2" (Bayonets)                     | Storz N0900     | 1   |
| VIENNA NASAL SPEC. #1 (short)                           | Storz N2121     | 1   |
| VIENNA NASAL SPEC. #3 (long)                            | Storz N2123     | 1   |
| ELEV NASAL FRACTURE BOIES (Persuader)                   | Storz N4655     | 1   |
| VIENNA NASAL SPEC. #4                                   | Storz N2106     | 1   |
| FCP ADSON 15CM 1 x 2 TOOTHED (Toothed Adsons)           | Pilling 181223  | 1   |
| FCP LUCAE EAR DEL 5 1/2" (Bayonetts)                    | Storz N0900     | 2   |
| CUP MEDICINE 2 OZ (Cup)                                 | Pilling 471115  | 3   |
| SCALPEL HANDLE # 7 (Long, skinny scalpel handle)        | Pilling M36-16  | 1   |
| ELEV COTTLE STORZ (Cottle)                              | Storz N4660     | 1   |
| KNIFE COTTLE NASAL (Cottle knife)                       | Storz N4240     | 1   |
| SUCTION ANGLED # 8                                      | Pilling 29302   | 1   |
| NH CRILE WOOD TC 7 (Needle driver)                      | Pilling 152782  | 1   |
| NH HALSEY 5 TC (short driver)                           | Pilling 152800  | 1   |
| FCP BACKHAUS TOWEL 5 1/2 (piercing towel clip)          | Pilling 121600  | 2   |
| FCP PEERS TOWEL 5 3/4 (Non piercing clip)               | Pilling 121650  | 5   |
| SCISS MAYO STR BEV 6 3/4 (Mayos)                        | Pilling 141312  | 1   |
| SCISS FOMON LOWER LAT CVD 5.0 (medium, curved scissors) | Pilling 056360  | 1   |
| SCISS KNIGHT NASAL MED WT (Septal scissors)             | Storz N2886     | 1   |
| FCP WILDE NASAL STR (Wildes)                            | Storz N2980     | 1   |
| WIEDER TONGUE DEPRESSOR S (Sweetheart)                  | Storz N7330     | 1   |
| Chuck Handle #3K, 10cm long (Beaver blade handle)       | Katena K20-1910 | 1   |
| JANSEN-MIDDLETON FCP.4X11 (Jansen-Middleton)            | Storz N3070     | 1   |

Total

33

Extant tray composition — septorhinoplasty

| DESCRIPTION                            | CATALOG        | QTY |
|----------------------------------------|----------------|-----|
| COTTLE SEPTUM SPECULUM                 | Storz N2200    | 1   |
| CUP MEDICINE 2 OZ                      | Pilling 471115 | 1   |
| FCP LUCAE EAR DEL 5 1/2" (Bayonets)    | Storz N0900    | 1   |
| WIEDER TONGUE DEPRESSOR L (Sweetheart) | Storz N7332    | 1   |
| SCISS OPER STR S/S 5.5                 | Pilling 460140 | 1   |
| VIENNA NASAL SPEC. #1 (short)          | Storz N2121    | 1   |
| VIENNA NASAL SPEC. #3 (long)           | Storz N2123    | 1   |
| SUCTION CURVED # 10                    | Pilling 29304  | 1   |
| STYLETTE                               |                | 1   |
| SUCTION ANGLED # 8                     | Pilling 29302  | 1   |
| STYLETTE                               |                | 1   |
| SUCTION MALLEABLE # 1 (Curved Suction) | Storz N2486    | 1   |
| STYLETTE                               |                | 1   |
| FCP PEERS TOWEL 5 3/4 (Piercing clips) | Pilling 121650 | 1   |

| DESCRIPTION                                       | CATALOG         | QTY |
|---------------------------------------------------|-----------------|-----|
| ELEV NASAL FRACTURE BOIES (Persuader)             | Storz N4655     | 1   |
| ENT Mallet (Hammer)                               |                 | 1   |
| COTTLE SEPTUM SPECULUM                            | Storz N2200     | 1   |
| VIENNA NASAL SPEC. #4                             | Storz N2106     | 1   |
| WIEDER TONGUE DEPRESSOR S (Sweetheart)            | Storz N7330     | 1   |
| FCP ADSON SERRATED 4-3/4" (Adsons)                | Pilling 181220  | 1   |
| FCP BROWN TISSUE 9 X 9 4-3/4 (Adson Browns)       | Pilling 181235  | 1   |
| FCP ADSON 15CM 1 x 2 TOOTHED (Toothed Adsons)     | Pilling 181223  | 1   |
| FCP LUCAE EAR DEL 5 1/2" (Bayonets)               | Storz N0900     | 2   |
| BUCK EAR CUR,DULL,#0 (Wax curette)                | Storz N0400-0   | 1   |
| CUP MEDICINE 2 OZ (Cup)                           | Pilling 471115  | 3   |
| FCP SUCTION UP (suction forceps, upgoing)         |                 | 1   |
| FCP SUCTION STRAIGHT (suction forceps, straight)  |                 | 1   |
| BACK BITER PEADIATRIC                             |                 | 1   |
| EAR SUCTION TUBING                                |                 | 1   |
| JANSEN-MIDDLETON FCP.4X11 (Jansen-Middleton)      | Storz N3070     | 1   |
| Chuck Handle #3K, 10cm long (Beaver blade handle) | Katena K20-1910 | 1   |
| SCALPEL HANDLE # 7 (Long, skinny scalpel handle)  | Pilling M36-16  | 1   |
| FREER ELEVATOR 7" D/E (Freer)                     | Storz N2348     | 1   |
| OSTEOTOME COTTLE 9MM                              | Storz N4339     | 1   |
| OSTEOTOME COTTLE 6MM                              | Storz N4337     | 1   |

| DESCRIPTION                                             | CATALOG                   | QTY |
|---------------------------------------------------------|---------------------------|-----|
| OSTEOTOME COTTLE 4MM                                    | Storz N4334               | 1   |
| ELEV HOWARTH (Howarth)                                  |                           | 1   |
| ELEV COTTLE STORZ (Cottle)                              | Storz N4660               | 1   |
| KNIFE COTTLE NASAL (Cottle knife)                       | Storz N4240               | 1   |
| RETR NEIVERT BALL TIP (2-ball retractor)                | Storz N4285               | 1   |
| HOOK GILLES SKIN LG 4MM (Skin hooks)                    | Pilling 054130            | 2   |
| SICKLE KNIFE 10MM CVD SNG                               | Storz N2909               | 1   |
| ballenger swivel knife                                  | Instrumentarium<br>477703 | 1   |
| suction freer                                           |                           | 1   |
| SUCTION ANGLED # 8                                      | Pilling 29302             | 1   |
| STYLETTE                                                |                           | 1   |
| SUCTION CURVED # 10                                     | Pilling 29304             | 1   |
| STYLETTE                                                |                           | 1   |
| SUCTION TUBE 4MM SHORT CV (shortest, 45 degree sucker)  | Karl Storz 586240         | 1   |
| SUCTION TUBE 3MM LONG CV (medium, 90 degree sucker)     | Karl Storz 586030         | 1   |
| SUCTION TUBE 3MM SHORT CV (medium, gentler curve)       | Karl Storz 586230         | 1   |
| NH CRILE WOOD TC 7 (Needle driver)                      | Pilling 152782            | 1   |
| NH HALSEY 5 TC (short driver)                           | Pilling 152800            | 1   |
| FCP HALSTEAD MOSQ CVD 5 (Curved mosequito)              | Pilling 182310            | 2   |
| FCP BACKHAUS TOWEL 5 1/2 (piercing towel clip)          | Pilling 121600            | 2   |
| FCP PEERS TOWEL 5 3/4 (Non piercing clip)               | Pilling 121650            | 5   |
| SCISS MAYO STR BEV 6 3/4 (Mayos)                        | Pilling 141312            | 1   |
| SCISS METZ CVD 5 3/4" REG (Metz)                        | Pilling 142200            | 1   |
| SCISS STEVENS TENOTOMY CVD 4.4 (Curved short stevens)   | Pilling 144352            | 1   |
| SCISS FOMON LOWER LAT CVD 5.0 (medium, curved scissors) | Pilling 056360            | 1   |
| SCISS EYE CVD 4 (sharpies)                              | Pilling 423434            | 1   |
| SCISS KNIGHT NASAL MED WT (Septal scissors)             | Storz N2886               | 1   |
| SCISS NASAL RT 11MM BLADES (Endoscopic scissors, Right) | Karl Storz 449202         | 1   |
| SCISS NASAL LFT 11MM BLADES (Endoscopic scissors, Left) | Karl Storz 449203         | 1   |
| SCISS NASAL STR 11MM BLADES (Endoscopic Scissors)       | Karl Storz 449201         | 1   |
| FCP BLAKESLEY UP #0 (Upgoing Blakesley)                 | Karl Storz 457000         | 1   |
| BLAKESLEY FCP 90' UP 4X10 (90 degree Blakesley)         | Karl Storz 456801         | 1   |
| OST ANT PNCH LF SIDE CUT (Left punch)                   | Karl Storz 459012         | 1   |
| OST ANT PNCH RT SIDE CUT (Right punch)                  | Karl Storz 459011         | 1   |
| OST ANT PNCH BCK 3MMX7MM (Straight punch)               | Karl Storz 459010         | 1   |
| FCP WILDE NASAL STR (Wildes)                            | Storz N2980               | 1   |
| FCP WEIL NASAL.STR.ROUND (Weil)                         | Storz N2974               | 1   |
| FCP BIOPSY STR DOUBLE SPOON 9" (Spoon nasal biopsy)     | Karl Storz 723030         | 1   |
| FCP GRASPING HEUWIESER ANTRUM 5.1" (Heuwieser)          | Xomed 3711071             | 1   |

| DESCRIPTION                                                                        | CATALOG                   | QTY      |
|------------------------------------------------------------------------------------|---------------------------|----------|
| SCISS COTTLE DORSAL ( <b>Cottle Scissors</b> )                                     | <b>Medtronic 37-13002</b> | <b>1</b> |
| MALLET COTTLE ( <b>Mallet</b> )                                                    | <b>Medtronic 37-14353</b> | <b>1</b> |
| ELEV NASAL FRACTURE BOIES ( <b>Persuader</b> )                                     | <b>Storz N4655</b>        | <b>1</b> |
| RONG KK D/A LT CVD LRG ( <b>Medium rongeur</b> )                                   | <b>Pilling 065212</b>     | <b>1</b> |
| RONG LEMPERT 6 STR 3 X 7MM ( <b>Lempert rongeur</b> )                              | <b>K-Medic KM47-258</b>   | <b>1</b> |
| SUCTION ANGLED # 8                                                                 | <b>Pilling 29302</b>      | <b>1</b> |
| Converse ( <b>Converse retractor</b> )                                             | <b>Xomed 3714472</b>      | <b>1</b> |
| CASTRO NH STR DEL W/LOCK ( <b>Castro driver with locking handle</b> )              | <b>Weck 004130</b>        | <b>1</b> |
| RETR COTTLE ALAR ( <b>Alar retractor, smooth</b> )                                 | <b>Medtronic 37-14187</b> | <b>1</b> |
| SPEC NASAL COTTLE 50MM ( <b>Nasal Speculum</b> )                                   | <b>Xomed 3714472</b>      | <b>1</b> |
| FCP PEERS TOWEL 5 3/4 ( <b>Non piercing towel clips</b> )                          | <b>Pilling 121650</b>     | <b>2</b> |
| BACKHAUS TOWEL CLIP 5 1/2 ( <b>Piercing towel clips</b> )                          | <b>Pilling 12-1600</b>    | <b>4</b> |
| FCP ROCH-PEAN HEMOSTAT CVD 6 1/4 ( <b>Curved Kelly</b> )                           | <b>Pilling 182445</b>     | <b>1</b> |
| NH HALSEY SMOOTH 5 TC ( <b>Small needle drive</b> )                                | <b>Pilling 152802</b>     | <b>2</b> |
| NH RYDER 1MM JAW 5 TC ( <b>Needle driver with black handle</b> )                   | <b>Pilling 354990</b>     | <b>1</b> |
| OSTEO LAMBOTTE-TYPE CVD 6.4MM ( <b>Long, curved osteo</b> )                        | <b>Zimmer 282-01</b>      | <b>1</b> |
| OSTEOTOME 3MM                                                                      | <b>Medtronic 37-14060</b> | <b>1</b> |
| Osteotome Cur #5 Right                                                             | <b>Xomed 3714090</b>      | <b>1</b> |
| Osteotome Cur #5 left                                                              | <b>Xomed 3714091</b>      | <b>1</b> |
| OSTEOTOME RUBIN 10MM EDGE                                                          | <b>Medtronic 37-14075</b> | <b>1</b> |
| OSTEOTOME RUBIN 12MM EDGE                                                          | <b>Xomed 3714076</b>      | <b>1</b> |
| OSTEOTOME COTTLE 6MM                                                               | <b>Storz N4337</b>        | <b>1</b> |
| OSTEOTOME BECKER SINGLE GUARD 3MM                                                  | <b>Medtronic CP313-1</b>  | <b>1</b> |
| ELEV FREER SEPTUM 4.5MM ( <b>Freer elevator</b> )                                  | <b>Medtronic 37-14038</b> | <b>1</b> |
| Rasp Fomon Dble End fine                                                           | <b>Xomed 3714148</b>      | <b>1</b> |
| Rasp Fomon Dble End Coarse                                                         | <b>Xomed 3714149</b>      | <b>1</b> |
| Elevator Cottle Skin ( <b>Cottle, thicker, shorter</b> )                           | <b>Xomed 3714126</b>      | <b>1</b> |
| ELEV COTTLE STORZ ( <b>Cottle elevator, longer, normal</b> )                       | <b>Storz N4660</b>        | <b>1</b> |
| KNIFE COTTLE NASAL ( <b>Cottle Knife</b> )                                         | <b>Storz N4240</b>        | <b>1</b> |
| SCISS STICH SHARP POINT ( <b>Sharp pointed short scissors</b> )                    | <b>Medtronic 37-41033</b> | <b>1</b> |
| SCISSOR STEVENS CURVED ( <b>Curved stevens, short</b> )                            | <b>Xomed 3741036</b>      | <b>3</b> |
| SCISS BECKER CONVERSE SERRATED ( <b>Sharp pointed, curved</b> )                    | <b>Medtronic CP1106</b>   | <b>1</b> |
| SCISS IRIS STR SS 4 1/2 ( <b>Sharpie scissors</b> )                                | <b>Pilling 144300</b>     | <b>1</b> |
| TISSUE BISHOP HARMS THD ( <b>Small pickups, size of Castros, teeth interlock</b> ) | <b>Ocutek 3257</b>        | <b>1</b> |
| FCP CATROVIEJO SUTURE 4 1 X 2 0.5MM ( <b>Castro pickups</b> )                      | <b>K-Medic KM53-456</b>   | <b>2</b> |
| FCP BROWN TISSUE 9 X 9 4-3/4 ( <b>Adson Browns</b> )                               | <b>Pilling 181235</b>     | <b>1</b> |
| FCP ADSON 15CM 1 x 2 TOOTHED ( <b>Toothed Adsons</b> )                             | <b>Pilling 181223</b>     | <b>1</b> |
| FCP BAYONET ( <b>Bayonets</b> )                                                    | <b>Instrumentarium</b>    | <b>1</b> |

Appendix to: John-Baptiste A, Sowerby LJ, Chin CJ, et al. Comparing surgical trays with redundant instruments with trays with reduced instruments: a cost analysis. *CMAJ Open* 2016. DOI: 10.9778/cmajo.2015-0092. Copyright © 2016 Joule Inc. or its licensors

| DESCRIPTION                                     | CATALOG            | QTY |
|-------------------------------------------------|--------------------|-----|
|                                                 | PL.5565            |     |
| SCISS MAYO STR BEV 6 3/4 (Mayos)                | Pilling 141312     | 1   |
| ELEV JOSEPH PERIOSTEAL (Periosteal)             | Medtronic 37-14125 | 1   |
| HOOK COTTLE SKIN DEEP CURVE SMALL (Single hook) | Medtronic 37-14108 | 2   |
| HOOK JOSEPH SKIN DBL 2MM (Wide double)          | Medtronic 37-14020 | 2   |
| HOOK JOSEPH SKIN DBL 10MM (Narrow double)       | Medtronic 37-14023 | 2   |
| RETR RAGNELL D/E 5.75 (Ragnell)                 | Pilling 054600     | 2   |
| HANDLE KNIFE STANDARD #3 (Normal handle)        | Pilling 352950     | 1   |
| KNIFE HANDLE BARRON (Cylindrical handle)        | Downs HG-275-05-G  | 1   |

Total

142

Reduced tray composition — septorhinoplasty

| DESCRIPTION                                                               | CATALOG            | QTY |
|---------------------------------------------------------------------------|--------------------|-----|
| COTTLE SEPTUM SPECULUM                                                    | Storz N2200        | 1   |
| CUP MEDICINE 2 OZ                                                         | Pilling 471115     | 1   |
| FCP LUCAE EAR DEL 5 1/2" (Bayonets)                                       | Storz N0900        | 1   |
| VIENNA NASAL SPEC. #1 (short)                                             | Storz N2121        | 1   |
| VIENNA NASAL SPEC. #3 (long)                                              | Storz N2123        | 1   |
| FCP LUCAE EAR DEL 5 1/2" (Bayonets)                                       | Storz N0900        | 2   |
| CUP MEDICINE 2 OZ (Cup)                                                   | Pilling 471115     | 3   |
| OSTEOTOME COTTLE 6MM                                                      | Storz N4337        | 1   |
| HOOK GILLES SKIN LG 4MM (Skin hooks)                                      | Pilling 054130     | 2   |
| SCISS KNIGHT NASAL MED WT (Septal scissors)                               | Storz N2886        | 1   |
| FCP WILDE NASAL STR (Wildes)                                              | Storz N2980        | 1   |
| MALLET COTTLE (Mallet)                                                    | Medtronic 37-14353 | 1   |
| ELEV NASAL FRACTURE BOIES (Persuader)                                     | Storz N4655        | 1   |
| SUCTION ANGLED # 8                                                        | Pilling 29302      | 1   |
| Converse (Converse retractor)                                             | Xomed 3714472      | 1   |
| SPEC NASAL COTTLE 50MM (Nasal Speculum)                                   | Xomed 3714472      | 1   |
| FCP PEERS TOWEL 5 3/4 (Non piercing towel clips)                          | Pilling 121650     | 2   |
| BACKHAUS TOWEL CLIP 5 1/2 (Piercing towel clips)                          | Pilling 12-1600    | 4   |
| NH HALSEY SMOOTH 5 TC (Small needle drive)                                | Pilling 152802     | 2   |
| Osteotome Cur #5 Right                                                    | Xomed 3714090      | 1   |
| Osteotome Cur #5 left                                                     | Xomed 3714091      | 1   |
| OSTEOTOME RUBIN 10MM EDGE                                                 | Medtronic 37-14075 | 1   |
| OSTEOTOME COTTLE 6MM                                                      | Storz N4337        | 1   |
| Rasp Fomon Dble End fine                                                  | Xomed 3714148      | 1   |
| Rasp Fomon Dble End Coarse                                                | Xomed 3714149      | 1   |
| ELEV COTTLE STORZ (Cottle elevator, longer, normal)                       | Storz N4660        | 1   |
| KNIFE COTTLE NASAL (Cottle Knife)                                         | Storz N4240        | 1   |
| SCISS STICH SHARP POINT (Sharp pointed short scissors)                    | Medtronic 37-41033 | 1   |
| SCISSOR STEVENS CURVED (Curved stevens, short)                            | Xomed 3741036      | 3   |
| SCISS IRIS STR SS 4 1/2 (Sharpie scissors)                                | Pilling 144300     | 1   |
| TISSUE BISHOP HARMS THD (Small pickups, size of Castros, teeth interlock) | Ocutek 3257        | 1   |
| FCP CATROVIEJO SUTURE 4 1 X 2 0.5MM (Castro pickups)                      | K-Medic KM53-456   | 2   |
| FCP BROWN TISSUE 9 X 9 4-3/4 (Adson Browns)                               | Pilling 181235     | 1   |
| FCP ADSON 15CM 1 x 2 TOOTHED (Toothed Adsons)                             | Pilling 181223     | 1   |
| SCISS MAYO STR BEV 6 3/4 (Mayos)                                          | Pilling 141312     | 1   |



| DESCRIPTION                                       | CATALOG            | QTY |
|---------------------------------------------------|--------------------|-----|
| HOOK COTTLE SKIN DEEP CURVE SMALL (Single hook)   | Medtronic 37-14108 | 2   |
| HOOK JOSEPH SKIN DBL 2MM (Wide double)            | Medtronic 37-14020 | 2   |
| HOOK JOSEPH SKIN DBL 10MM (Narrow double)         | Medtronic 37-14023 | 2   |
| RETR RAGNELL D/E 5.75 (Ragnell)                   | Pilling 054600     | 2   |
| HANDLE KNIFE STANDARD #3 (Normal handle)          | Pilling 352950     | 1   |
| KNIFE HANDLE BARRON (Cylindrical handle)          | Downs HG-275-05-G  | 1   |
| WIEDER TONGUE DEPRESSOR S (Sweetheart)            | Storz N7330        | 1   |
| Chuck Handle #3K, 10cm long (Beaver blade handle) | Katena K20-1910    | 1   |
| JANSEN-MIDDLETON FCP.4X11 (Jansen-Middleton)      | Storz N3070        | 1   |

Total

60
